1 **Ten months of temporal variation in the clinical journey of hospitalised patients with**  
2 **COVID-19: an observational cohort**

3

4 **ISARIC Clinical Characterisation Group**

5

6 **Corresponding author:** Matthew Hall (matthew.hall@bdi.ox.ac.uk)

7

8 **Abstract**

9

10 **Background:** There is potentially considerable variation in the nature and duration of the  
11 care provided to hospitalised patients during an ongoing infectious disease epidemic or  
12 pandemic. Improvements in care and clinician confidence may shorten the time spent as an  
13 inpatient, or the need for admission to an intensive care unit (ICU) or high density unit  
14 (HDU), while novel treatment modalities may reduce the time course of illness. On the other  
15 hand, limited resources at times of high demand may lead to rationing of resources, with  
16 less beneficial consequences. Despite little evidence on how the values of such variables  
17 change over the course of a crisis (such as the current COVID-19 pandemic), they may  
18 nevertheless be used as proxies for disease severity, outcome measures for clinical trials,  
19 and to inform planning and logistics. We hypothesise that variation of this kind has been  
20 present over the first year of the pandemic.

21 **Methods and Findings:** We investigate such time trends in an extremely large international  
22 cohort of 142,540 patients with symptom onset of, or hospital admission for, COVID-19  
23 during 2020. The variables investigated are time from symptom onset to hospital admission,  
24 probability of ICU/HDU admission, time from hospital admission to ICU/HDU admission,

25 **NOTE:** This preprint reports new research that has not been certified by peer review and should not be used to guide clinical practice. case fatality ratio (CFR) and total length of hospital stay. Time from hospital symptom onset

26 to hospital admission showed a rapid decline during the first months of the pandemic  
27 followed by peaks during August/September and December. ICU/HDU admission was more  
28 frequent from June to August, while there were only modest time trends in time from  
29 hospital admission to ICU/HDU. The CFR was lowest from June to August, a trend mostly  
30 driven by patients with no ICU/HDU admission. Raw numbers for overall hospital stay  
31 showed little overall variation over the time period, but further examination reveals a clear  
32 decline in time to discharge for ICU/HDU survivors. The main limitations are that these are  
33 predominantly severe COVID-19 cases, and that there are temporal, spatial and  
34 demographic biases present in an observational study of this kind.

35 **Conclusions:** Our results establish that variables of these kinds have limitations when used  
36 as outcome measures in a rapidly-evolving situation.

37  
38

### 39 Introduction

40  
41

42 During an epidemic or pandemic of a novel infectious disease, variations in the duration of  
43 each stage of a hospitalised patient's progress from symptom onset, to hospital admission,  
44 and hence to outcome are critical for an effective response. Clinicians use these data as a  
45 proxy for disease severity, and to provide prognostic information to patients and their  
46 families. Policy makers use these data to inform system wide planning for staffing,  
47 infrastructure, to predict requirements for consumables (such as personal protective  
48 equipment), and to assess performance of the hospital system. And for clinical research,  
49 these measures are used as trial outcomes to determine the efficacy of novel treatments.  
50  
51 Often, the extent to which patient journeys vary during an epidemic is not understood.

52 There are changes in clinical practice (World Health Organisation 2021) - clinical

53 understanding of the natural history of diseases improves with time (Docherty et al. 2021),  
54 and so too, confidence in safe discharge criteria or alternative models of care (Rojek and  
55 Horby 2016), such as remote monitoring (Nunan et al. 2020; Bell et al. 2021). Moreover, the  
56 introduction of effective treatments (Rochwerg et al. 2020) and standardisation of care may  
57 rapidly reduce the severity or time course of illness (Dennis et al. 2021). However, decisions  
58 about whether to admit or escalate care are also dependent on logistic factors such as the  
59 availability of resources (e.g. ventilators, intensive care beds, staff) that may be rationed  
60 during the peak of a pandemic, but abundant at other phases of an outbreak (Tyrrell et al.  
61 2021; National Institute for Health and Care Excellence 2021; Pagel, Utley, and Ray 2020).  
62 There may also be changes in policy to admit patients for indications that are not clinical –  
63 such as to facilitate effective quarantine (CMO Messaging 2021) or supervise provision of  
64 treatments in clinical trials. We hypothesise that there is significant variation in the patient  
65 journey over a pandemic period, and that this variability may limit the way these data can  
66 be responsibly used.

67

68 In this paper, we assess temporal changes in hospital admission, length of stay, and  
69 escalation of care for hospitalized patients with SARS-CoV-2 infection included in the  
70 International Severe Acute Respiratory and emerging Infection Consortium (ISARIC) WHO  
71 Clinical Characterisation Protocol International cohort (ISARIC Clinical Characterisation  
72 Group 2020). This is to our knowledge the largest, prospective international cohort including  
73 standardised clinical data, and, as of the time of writing, includes data collected from 26  
74 January 2020 to 7 April 2021 on 483,929 people hospitalised with COVID-19 in 1,609 sites in  
75 54 countries.

76

77 We use this dataset to determine whether these variables did indeed change over the  
78 course of the SARS-CoV-2 pandemic during 2020, and where there are changes, explore if  
79 there are predictable influences that account for this.

80

## 81 **Methods**

82

83 As previously described (ISARIC Clinical Characterisation Group, Pritchard, and Olliaro 2020),  
84 eligible for recruitment were patients with confirmed or suspected COVID-19 infection  
85 admitted to an ISARIC partner site and submitted to the ISARIC-hosted REDCap system.  
86 Additional data contributed to ISARIC via other mechanisms have not been included due to  
87 differences in data structure. The datasets used in analyses in this paper are drawn from a  
88 population of all patients with a symptom onset date, or hospital admission date, recorded  
89 between March and December 2020 inclusive. Where patients had a recorded hospital  
90 admission date before their symptom onset date, this was taken to be a nosocomial  
91 infection. The commencement of any patient's hospital treatment for COVID-19, hereafter  
92 "COVID-19 admission date", was taken to be the later of the symptom onset date and  
93 hospital admission date.

94

95 We used the complete dataset described above to explore temporal variation in six  
96 variables or collections of variables. Not all patients had recorded information for the  
97 variables of interest in each question, so, in each case, a subset was analysed. The questions  
98 and data subsets were as follows:

99 **Question 1:** Variation in the time from symptom onset to hospital admission. Patients were  
100 excluded if this variable was not available, or if they had nosocomial infection.

101 **Question 2:** Variation in the proportion of patients being admitted to an ICU or HDU.

102 Patients were excluded if this variable was not available.

103 **Question 3:** Variation in the time from COVID-19 admission to ICU/HDU admission. Patients

104 were excluded if they were never admitted to an ICU or HDU, or if this variable was

105 otherwise not available.

106 **Question 4:** Variation in the overall case fatality rate. Patients were excluded if the final

107 outcome of their hospital stay was either not recorded or recorded as something other than

108 “death” or “discharge” (for example, transfer to another facility).

109 **Question 5:** Variation in the time from COVID-19 admission to death or discharge. (We

110 describe either as an “outcome”.) Exclusions were as in question 4, as well as patients who

111 had a recorded outcome but no recorded outcome date.

112 **Question 6:** Variation in the status of patients (admitted, ICU/HDU admitted, dead,

113 discharged, or unknown outcome) on a given day after admission. Excluded here were

114 patients whose ICU/HDU status on the day of admission was unknown.

115

116 Further filtering was done to a) remove any nonsensical values (such as recorded time of

117 hospital admission after hospital exit), b) remove patients admitted to hospital in 2021 for

118 all questions except 1 (such patients were included when exploring the latter due to right

119 censoring concerns if they were omitted), and c) where a time period was the variable of

120 interest (questions 1, 3, 5 and 6), remove patients with the top 2.5% of values of those

121 variables (as this range included outliers that may have been the result of incorrect data

122 entry).

123

124 For all analyses with a single outcome variable, we plotted its mean value against the

125 epidemiological week of symptom onset (question 1) or COVID-19 admission (others), both  
126 overall and with respect to various variables of interest (e.g. age group).

127

128 For the exploration of patient status by day after COVID-19 admission (question 6), the  
129 progress of a patient across the course of their hospital stay was visualised by means of  
130 Sankey diagrams. Five states were considered: ward occupancy, ICU/HDU occupancy, the  
131 final outcomes of death or discharge, and unknown outcome. We recorded the state of each  
132 patient on the day of admission, on every subsequent day, and their final outcome. Where a  
133 patient's exact location (ward or ICU/HDU) in the hospital was not recorded on a given day,  
134 their last known location was used. For the figures in this article we present only the data on  
135 day of COVID-19 admission (A), three days later (A+3), seven days later (A+7) and final  
136 outcome (O+1). We have also developed an interactive version which we hope to make  
137 available to the research community as soon as possible.

138

139 We used two special categories of symptoms at admission: "common" symptoms (cough,  
140 fatigue, fever, and shortness of breath) and gastrointestinal symptoms (abdominal pain,  
141 diarrhoea, and vomiting). We introduced variables to the dataset counting the number of  
142 each of these categories present for each patient. Missing data was disregarded here, so  
143 these represent lower bounds.

144

## 145 **Statistical analysis**

146

147 Multivariable linear regression was used to investigate factors associated with time from  
148 onset of symptoms to hospital admission (question 1), time from COVID-19 admission to

149 ICU/HDU admission (question 3), and time from COVID-19 admission to death or discharge  
150 (question 5). In all cases the dependent variable was log-transformed and a pseudocount of  
151 1 added in order to prevent taking logarithms of zero. Multivariable logistic regression was  
152 used to investigate factors associated with ICU/HDU admission (question 2) and fatal  
153 outcome (question 5). (For a full list of variables used, see supplementary text S1.) For all  
154 regression analyses we analysed the presence of comorbidities as covariables. As there was  
155 a considerable amount of missing data for each of these, we introduced an “unknown” class  
156 to the regression models for these variables rather than exclude patients without values for  
157 them entirely. After this modification, every regression analysis was performed as a  
158 complete case analysis.

159

160 The statistical significance of the variables for month of admission or onset, for age, and for  
161 the inclusion of interaction terms used in the regressions for CFR (question 4) and time to  
162 outcome (question 5), was assessed using Wald tests.

163

## 164 **Software**

165

166 All analyses were performed in R 4.0.3 (R Core Team 2013), with packages including the  
167 *tidyverse* (Wickham et al. 2019), and *ggalluvial* (Brunson 2020).

168

## 169 **Results**

170

### 171 **Patient characteristics**

172 Our complete dataset consisted of 142,540 patients (60,977 female, 81,325 male, 238

173 unknown sex), median age 70 [IQR 56-82]), admitted at 620 sites in 47 countries. Table 1  
 174 shows a summary of baseline characteristics, and more detail, including country of origin  
 175 and cross tabulation by month of admission, can be found in table S1. Table 2 shows the  
 176 prevalence of symptoms at admission and comorbidities. 1030 individuals (0.7%) were  
 177 pregnant women. (For more details, see supplementary table S1.)

| Variable                                                       | Value     | Number of patients | Percent |
|----------------------------------------------------------------|-----------|--------------------|---------|
| <b>Total</b>                                                   |           | 142540             | 100     |
| <b>Date of COVID-19 admission<br/>(month of 2020, or 2021)</b> | March     | 27108              | 19      |
|                                                                | April     | 42267              | 29.7    |
|                                                                | May       | 12311              | 8.64    |
|                                                                | June      | 5342               | 3.75    |
|                                                                | July      | 2811               | 1.97    |
|                                                                | August    | 2218               | 1.56    |
|                                                                | September | 5265               | 3.69    |
|                                                                | October   | 13822              | 9.7     |
|                                                                | November  | 15155              | 10.6    |
|                                                                | December  | 13205              | 9.26    |
|                                                                | 2021*     | 3036               | 2.13    |
| <b>Sex</b>                                                     | Female    | 60977              | 42.8    |
|                                                                | Male      | 81325              | 57.1    |
|                                                                | Unknown   | 238                | 0.167   |
| <b>Age group</b>                                               | 0-19      | 2730               | 1.92    |
|                                                                | 20-39     | 9546               | 6.7     |
|                                                                | 40-59     | 31368              | 22      |
|                                                                | 60-69     | 23431              | 16.4    |
|                                                                | 70-79     | 30541              | 21.4    |
|                                                                | 80+       | 42092              | 29.5    |
|                                                                | Unknown   | 2832               | 1.99    |
| <b>Nosocomial infection</b>                                    | No        | 121910             | 85.5    |
|                                                                | Yes       | 11695              | 8.2     |
|                                                                | Unknown   | 8935               | 6.27    |

178  
 179 **Table 1:** Baseline characteristics of the included patients. \*Some patients admitted in early  
 180 2021 are included in order to fully represent patients with symptom onset in December  
 181 2020.



182

|                                                         | Name                          | % present   | <i>n</i> present/ <i>n</i> data recorded |
|---------------------------------------------------------|-------------------------------|-------------|------------------------------------------|
| <b>Symptoms at admission</b>                            | Cough (C)                     | 66.8        | 89438/133809                             |
|                                                         | Shortness of breath (C)       | 64.8        | 92129/142275                             |
|                                                         | Fever (C)                     | 63.4        | 86494/136344                             |
|                                                         | Fatigue (C)                   | 44.9        | 54263/120816                             |
|                                                         | Confusion                     | 24.7        | 31604/127817                             |
|                                                         | Vomiting (G)                  | 19.9        | 25135/126299                             |
|                                                         | Myalgia                       | 18.9        | 21482/113862                             |
|                                                         | Diarrhoea (G)                 | 18.2        | 22953/125804                             |
|                                                         | Headache                      | 12          | 13754/114530                             |
|                                                         | Abdominal pain (G)            | 11          | 13500/122785                             |
|                                                         | Ageusia                       | 9           | 7103/78674                               |
|                                                         | Wheezing                      | 7.6         | 9011/118028                              |
|                                                         | Anosmia                       | 6.9         | 5550/80040                               |
|                                                         | Runny nose                    | 3.4         | 3745/110937                              |
|                                                         | Ulcers                        | 2.1         | 2306/107859                              |
|                                                         | Bleeding                      | 1.7         | 2123/121852                              |
|                                                         | Rash                          | 1.5         | 1744/116123                              |
| Seizures                                                | 1.5                           | 1821/123380 |                                          |
| Lymphadenopathy                                         | 0.7                           | 783/114739  |                                          |
| Conjunctivitis                                          | 0.5                           | 564/115518  |                                          |
| Ear pain                                                | 0.5                           | 489/97145   |                                          |
| <b>Number of recorded “common” symptoms (C)</b>         | 0                             | 7.6         | 10836/142540                             |
|                                                         | 1                             | 20.5        | 29257/142540                             |
|                                                         | 2                             | 26.4        | 37681/142540                             |
|                                                         | 3                             | 29          | 41359/142540                             |
|                                                         | 4                             | 16.4        | 23407/142540                             |
| <b>Number of recorded gastrointestinal symptoms (G)</b> | 0                             | 69.3        | 98714/142540                             |
|                                                         | 1                             | 20.3        | 28874/142540                             |
|                                                         | 2                             | 8.5         | 12142/142540                             |
|                                                         | 3                             | 2           | 2810/142540                              |
| <b>Comorbidities</b>                                    | Hypertension                  | 47.5        | 51415/108319                             |
|                                                         | Chronic cardiac disease       | 29.5        | 38747/131247                             |
|                                                         | Diabetes                      | 16.8        | 20417/121817                             |
|                                                         | Chronic pulmonary disease     | 16.4        | 22434/136569                             |
|                                                         | Chronic kidney disease        | 15.6        | 21199/136148                             |
|                                                         | Obesity                       | 14.5        | 17114/118025                             |
|                                                         | Asthma                        | 13.3        | 18147/136243                             |
|                                                         | Dementia                      | 12.7        | 16538/130084                             |
|                                                         | Smoking                       | 12.7        | 7401/58331                               |
|                                                         | Chronic neurological disorder | 11.4        | 15447/135673                             |
|                                                         | Rheumatological disorder      | 11.2        | 14118/126277                             |
|                                                         | Malignant neoplasm            | 9.3         | 12548/135418                             |
|                                                         | Chronic haematologic disease  | 4.1         | 5199/126563                              |
|                                                         | Liver disease                 | 3.4         | 4515/131580                              |
|                                                         | Malnutrition                  | 2.6         | 3125/122243                              |
| HIV/AIDS                                                | 0.4                           | 525/122021  |                                          |

183

184 **Table 2:** Prevalence of symptoms at hospital admission and comorbidities. The final column  
185 gives the number of times the condition is recorded as present over the number of times its  
186 presence or absence is recorded (i.e. the data is non-missing). Designated “common”  
187 symptoms are indicated with a (C) and gastrointestinal symptoms with a (G); the number  
188 and percentages of patients presenting with combinations of these are separately  
189 presented.

190

191 **Time from symptom onset to hospital admission (question 1)**

192

193

194 After excluding individuals with apparent nosocomial infection, we analysed length of illness  
195 before hospitalisation amongst those patients for whom this information was recorded ( $n =$   
196 118,980, 83.5%). The median time from symptom onset to admission was 5 days (IQR 1-8).

197 This variable showed a marked decline during March, from a median of 9 days (IQR 5-14) for  
198 patients with onset in the week beginning March 1 to 3 (IQR 0-7) in that beginning April 5.

199 Little further variation occurred until late July, when a gradual increase started, which then  
200 peaked at a median of 6 (IQR 2-9) for the weeks in late August and early September before a  
201 decline to a low of a median 4 (IQR 1-7) days in November; this was followed by another  
202 slight increase in December. Times from onset of symptoms to admission were shortest in  
203 the oldest and youngest age groups (figure 1b). Patients with a fatal outcome had, generally,  
204 shorter times from onset of symptoms until admission compared to survivors (figure 1c).

205

206 The four most frequent symptoms at admission were cough, fever, shortness of breath, and  
207 fatigue; we class these as “common” (see Methods). The number of these that were present  
208 increased with time to hospital admission (figure 1d), with the shortest times of all occurring  
209 amongst those presenting with none of them. Amongst the 4,636 patients in this analysis  
210 presenting with none, the most common other symptoms were confusion (51.6%), vomiting  
211 (31.7%), abdominal pain (26%) and diarrhoea (18.9%). Within this group, confusion was the  
212 single most common presenting symptom documented in patients over 60, while in younger  
213 age groups the most prevalent symptoms were gastrointestinal (see supplementary table  
214 S3).

215

216 We further explored this question using a multivariable linear regression analysis  
217 (supplementary table S4). When compared to April, times from symptom onset to admission  
218 were shorter in May and June, and longer in March and from August onwards (all  $p < 0.01$ ;  
219 see table S4 for confidence intervals). There was very strong evidence of an overall effect of  
220 month of onset on time from onset to admission (Wald test  $p < 0.001$ ). Patients aged 40-59  
221 showed the longest times to admission when compared to any other age group (all  $p < 0.001$ ;  
222 see table S4 for CIs). Time from symptom onset to admission was also positively associated  
223 with the number of “common” symptoms (25% increase per symptom, 95% CI 24.4%-  
224 25.6%), the number of gastrointestinal symptoms (9.8% increase per symptom, 95% CI 9%-  
225 10.5%), male sex (4.4% increase, 95% CI 3.4%-5.5%) and discharge as the final outcome  
226 (13% increase, 95% CI 11.6%-14.5%).

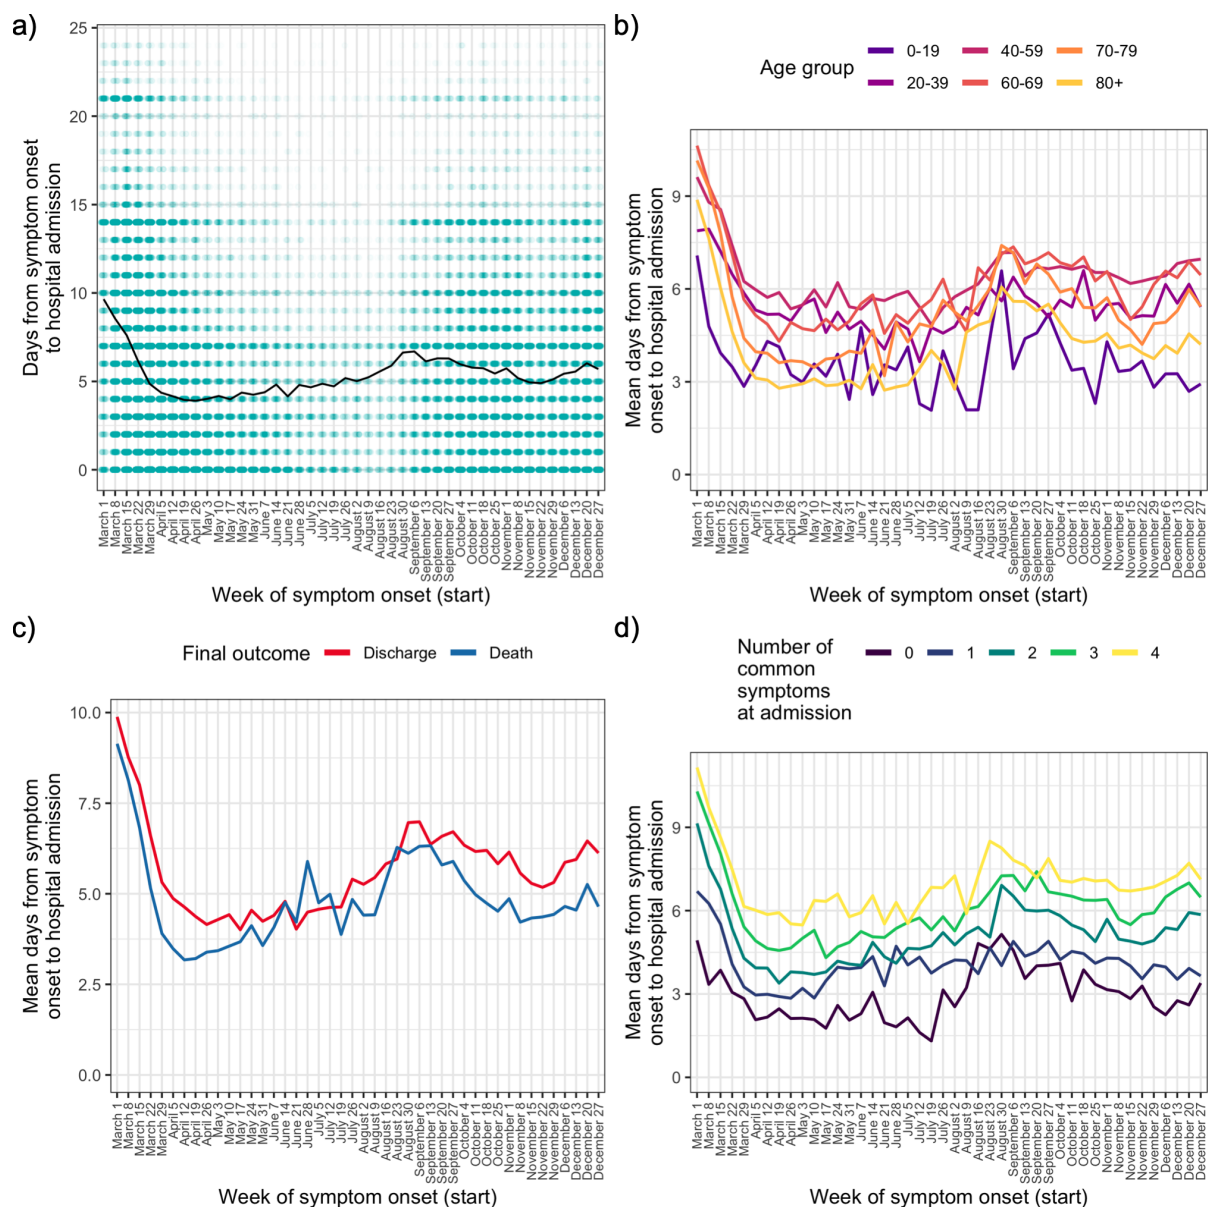

227

228

**Figure 1:** Time from reported symptom onset to hospital admission, by week of reported

229

symptom onset. a) Green cells represent binned patients, with darker colours corresponding

230

to more individuals. The black line represents the mean. b)-d) Mean time to admission

231

plotted by patient characteristics: a) age group, b) final outcome, c) number of the four

232

most common symptoms (cough, fatigue, fever and shortness of breath) present upon

233

admission.

234

235

236

237 **ICU/HDU admission and time to ICU/HDU admission (questions 2 and 3)**

238

239 138,254 (97%) of patients with COVID-19 admission in 2020 had recorded data on whether  
240 they ever admitted to an ICU/HDU or not; of these, 29,576 (21.4%) had been admitted at  
241 least once. The proportion of individuals with an ICU/HDU admission showed a marked  
242 decline over March followed by a renewed peak, and then subsequent decline, in June  
243 through August (supplementary figure S1a). The oldest age group (80+) had by far the  
244 smallest proportion of ICU/HDU admissions over the whole timeline (5.4%, compared with,  
245 for example, 33.8% in the age-group 60-69). In a multivariable logistic regression model  
246 (supplementary table S5), the following patterns were observed: there were higher odds of  
247 ICU/HDU admission during all months except May, when compared to April (all  $p < 0.01$ , see  
248 table S5 for CIs); those aged 80+ had lower odds of ICU/HDU admission (OR 0.12 for  
249 admission when compared to the 40-59 age group, 95% CI 0.11-0.13). Males were more  
250 likely to be admitted to ICU/HDU (OR 1.53, 95% CI 1.47-1.59). Patients who died had greatly  
251 increased odds of having been previously admitted (OR 5.38, 95% CI 5.13-5.65). Compared  
252 to those with symptom onset less than a week before hospital admission, patients with  
253 nosocomial infections had lower odds of being admitted to ICU/HDU (OR 0.68, 95% CI 0.62-  
254 0.74), whereas those with longer times to hospital admission had increased odds (OR 1.36  
255 for 7-13 days, 95% CI 1.31-1.42, 1.28 for 14 or more days, 95% CI 1.2-1.37). An overall effect  
256 of month of COVID admission on odds of ICU/HDU admission was highly significant (Wald  
257 test  $p < 0.0001$ ). Increasing numbers of gastrointestinal symptoms (abdominal pain, vomiting,  
258 diarrhoea) were associated with slightly lower odds of admission (OR 0.94 per symptom,  
259 95% CI 0.91-0.96). Comorbidities associated with higher odds of admission were HIV/AIDS

260 (OR 1.46, 95% CI 1.14-1.88), hypertension (OR 1.26, 95% CI 1.2-1.32) and obesity (OR 1.74,  
261 95% CI 1.65-1.83), whereas a wide variety of serious or chronic medical conditions were  
262 associated with lower odds (see Table S5), as was smoking (OR 0.82, 95% CI 0.85-0.9). The  
263 most extreme fitted odds ratio for a comorbidity with a positive association was 1.74 for  
264 obesity, while that for an inverse association was 0.21 for dementia.

265

266 We next analysed time from COVID-19 admission in 2020 to first ICU/HDU admission.

267 Excluding those with missing data on this variable, this dataset comprised 26,687 individuals  
268 with a maximum time to ICU/HDU of thirteen days. The median time to ICU/HDU was 1 day  
269 (IQR 0-2). Raw time trends in this variable were modest (supplementary figure S1b).

270 Multivariable linear regression (supplementary table S6) nevertheless did show evidence for  
271 an overall association with month of COVID-19 admission (Wald test  $p < 0.001$ ), with, when  
272 compared to April, evidence for longer times to ICU/HDU in March, October and December  
273 (all  $p < 0.001$ ; see Table S6). Time to ICU/HDU also showed a general increase with age (Wald

274 test for overall association  $p < 0.001$ ). There was no evidence of an association with final

275 outcome (death or discharge) or with sex. Time to ICU/HDU admission increased with the

276 number of GI symptoms (9% increase per symptom, 95% CI 7.5%-10.5%). Compared to

277 patients admitted to hospital within a week of symptom onset, those with a nosocomial

278 infection had a 66% increase in time to ICU/HDU (95% CI 54.4%-78.4%) while those with

279 longer times to admission had shorter times to ICU/HDU (9.2% decrease for 7-13 days, 95%

280 CI 7.1%-11.1%, 14.9% decrease for 14 or more days, 95% CI 11.8%-17.8%). Comorbidities

281 associated with longer time to ICU/HDU were asthma (7% increase, 95% CI 3.8%-10.2%),

282 chronic haematological disease (20.6% increase, 95% CI 12.8%-28.9%), and chronic kidney

283 disease (9.8% increase, 95% CI 5.9%-13.9%). In contrast, obesity (7.5% decrease, 95% CI

284 5.1%-9.9%), diabetes (3.5% decrease, 95% CI 0.7%-6.1%) and smoking (4.9% decrease, 95%  
285 CI 0.1%-9.5%) were associated with shorter time to ICU. There was also evidence of a longer  
286 time to ICU/HDU amongst pregnant patients (17.5%, 95% CI 3.4%-33.5%).

287

288

#### 289 **Case fatality rate and time from COVID-19 admission to outcome (questions 4 and 5)**

290

291 We next analysed the final outcome of death or discharge, and the total time from hospital  
292 admission to one of those outcomes, in a set of 113,797 patients admitted during 2020 with  
293 one of those outcomes recorded (81.8% of the total). The raw case fatality rate (CFR) was  
294 0.3. The median time to death was 8 days (IQR 4-14) and to discharge 7 (IQR 4-14). Over the  
295 entire ten-month period of interest (supplementary figure S4), peak CFR was 0.35 in the  
296 week beginning 8 March. There was a decline over the spring to a low of 0.17 in the week  
297 beginning 12 July, but this trend subsequently reversed and reached 0.32 by mid-December.

298 At the same time, the mean time from admission to outcome in this whole population

299 showed very little change following a dramatic decline during March, from 16 days in the

300 week beginning 1 March to 10 at the start of April (supplementary figure S3). These overall

301 patterns, however, mask substantial variation based on ICU/HDU admission and, in the

302 latter case, outcome (figure 2). The trend in CFR is largely driven by patients who were not

303 admitted to an ICU or HDU. The most consistent decline in time to outcome was observed in

304 ICU/HDU admissions who survived (a decline in the mean of 7.6 days between the first and

305 last weeks studied, figure 2B, bottom left) while survivors with no ICU/HDU admission

306 showed, as with the overall trend, little change after March (bottom right). Variation in time

307 to death appeared very modest amongst patients with an ICU/HDU admission (top left),



308 while there was a distinct peak around August and September in those without (top right).  
 309 When age is also considered (supplementary figures S5 and S6) a notable additional pattern  
 310 is the clear correlation of time to discharge and age in surviving non-ICU/HDU patients,  
 311 which is much less obvious, if present at all, in patients with an ICU/HDU admission.  
 312

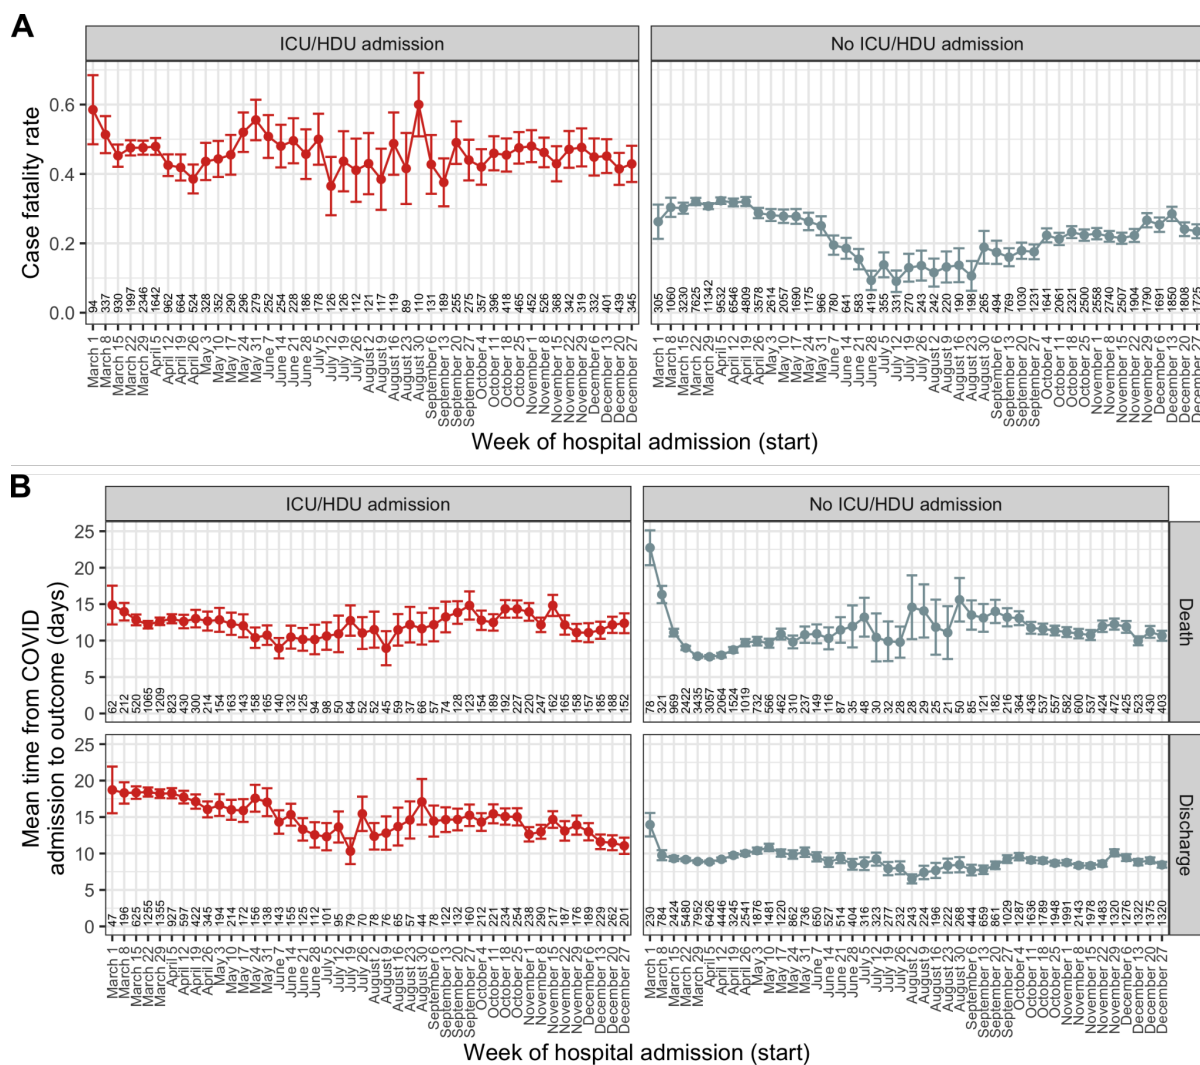

313 **Figure 2:** A) Time trends in case fatality ratio, by recorded ICU/HDU admission. B) Time  
 314 trends from COVID-19 admission to the outcome of death or discharge, further faceted by  
 315 ICU/HDU admission. Points are mean values, and error bars represent the 95% confidence  
 316 interval for the mean. Numbers along the x-axis indicate the numbers of patients involved in



319 each category.

320

321

322 The full results of the three multivariable regression analyses can be seen in table 4. There  
323 was strong evidence of an association of month of COVID-19 admission with all three  
324 variables (Wald test  $p < 0.001$  in all cases).

325

326 Amongst non-ICU/HDU patients, the month with the greatest odds of death was March (OR  
327 1.12 compared to April, 95% CI 1.06-1.17), while that with the smallest was July (OR 0.35,  
328 95% CI 0.29-0.43). April (the reference category) was the month with the shortest time to  
329 death, while August had the longest (47.1% increase, 95% CI 29.5%-67.2%). Variation in time  
330 to discharge was more modest; the month with the largest value of this variable was March  
331 (3.6% increase, 95% CI 2.1%-5.2%), and that with the shortest was August (10.8% decrease,  
332 95% CI 6.4%-15%).

333

334 ICU/HDU admission was associated with a 7.5-fold higher odds of death (95% CI 6.74-7.83),  
335 a 68.1% increase in time to death (95% CI 58.9%-77.8%) and a 149.9% increase in time to  
336 discharge (95% CI 132.8%-147.1%). As a result of the patterns observed in figure 2, we also  
337 fitted interaction terms of month of COVID-19 admission with ICU/HCU admission. Their  
338 inclusion was consistently statistically significant (Wald test  $p < 0.001$  in all cases), although  
339 for odds of death this ceases to be true when December is removed ( $p = 0.24$ ). Hence, the  
340 overall increased odds of death amongst ICU/HDU patients was significantly mitigated in  
341 December (combined OR 5.96 vs non-ICU/HDU admissions in December, 95% CI 5.13-6.92).

342 There was no evidence that ICU/HDU patients admitted in March and May had a longer time

343 to death than April, but the estimates for all other months were significantly longer, with  
344 the peak in November (18.5% increase, 95% CI 13.1%-24.1%). The longest times to  
345 discharge were in March (4.3% increase vs April, 95% CI 1.3%-7.3%) and the shortest in  
346 December (26.4% decrease, 95% CI 22.8%-29.8%).

347

348 Increasing age was associated with monotonic increases in odds of death and time to  
349 discharge, with and without ICU/HDU admission. Time to death showed little evidence of  
350 variation by age in non-ICU/HDU patients except for marginal evidence for an increase in  
351 the oldest age group (4.7% increase vs 40-59, 95% CI 0.2%-9.5%). In ICU/HDU patients,  
352 however, where an interaction term was again fitted, the shortest times to death were  
353 recorded in both the youngest (43.1% decrease, 95% CI 30.4%-53.6%) and oldest (25.2%  
354 decrease, 95% CI 22.2%-28.1%) groups; longest times to death were in middle-aged adults  
355 (40-69). (Note that all recorded comorbidities were controlled for here.) Male sex was  
356 associated with higher odds of death (OR 1.31, 95% CI 1.27-1.435, and small increases in  
357 time to both death (3.2% increase, 95% CI 1.7%-4.8%) and discharge (1.1% increase, 95% CI  
358 0.1%-2%). Nosocomial infection was also associated with higher odds of death (OR 1.27,  
359 95% CI 1.2-1.34) and large increases in time to death (20.6% increase, 17.8%-23.5%) and  
360 discharge (45.6% increase, 95% CI 42.8%-48.5%). Patients admitted more than a week from  
361 symptom onset had lower odds of death, and shorter stays in hospital, regardless of  
362 outcome (see table 4). Where associations with comorbidities were detected, the majority  
363 were in the direction of poorer outcomes (increased CFR, decreased time to death, and  
364 increased time to discharge), with a few exceptions. Most notably, asthma was associated  
365 with lower odds of death (OR 0.92, 95% CI 0.88-0.97), longer times to death (2.5% increase,  
366 CI 0.2%-4.8%) and shorter times to discharge (1.7% decrease, 95% CI 0.3%-3%).

367

|                                                                  | Odds ratio<br>(death vs discharge) | Time to death<br>(% change, days) | Time to discharge<br>(% change, days) |
|------------------------------------------------------------------|------------------------------------|-----------------------------------|---------------------------------------|
| Month of COVID admission (ref: April)                            |                                    |                                   |                                       |
| March                                                            | 1.117*** (1.064, 1.173)            | 14.692*** (12.176, 17.264)        | 3.627*** (2.097, 5.180)               |
| May                                                              | 0.734*** (0.689, 0.783)            | 15.408*** (11.962, 18.961)        | 1.340 (-0.591, 3.308)                 |
| June                                                             | 0.525*** (0.470, 0.586)            | 20.489*** (13.967, 27.386)        | -2.832 (-5.584, 0.0002)               |
| July                                                             | 0.349*** (0.286, 0.427)            | 27.666*** (14.513, 42.330)        | -8.526*** (-12.156, -4.747)           |
| August                                                           | 0.430*** (0.338, 0.548)            | 47.134*** (29.453, 67.230)        | -10.793*** (-14.981, -6.398)          |
| September                                                        | 0.569*** (0.507, 0.638)            | 40.603*** (32.489, 49.213)        | -3.122* (-5.725, -0.448)              |
| October                                                          | 0.643*** (0.601, 0.687)            | 33.306*** (28.981, 37.777)        | -1.445 (-3.233, 0.376)                |
| November                                                         | 0.622*** (0.584, 0.663)            | 26.799*** (22.875, 30.847)        | -3.555*** (-5.234, -1.846)            |
| December                                                         | 0.801*** (0.749, 0.857)            | 26.251*** (22.284, 30.347)        | 2.133* (0.196, 4.108)                 |
| Age group (ref: 40-59)                                           |                                    |                                   |                                       |
| 0-19                                                             | 0.255*** (0.164, 0.395)            | -0.983 (-24.593, 30.019)          | -33.560*** (-35.658, -31.393)         |
| 20-39                                                            | 0.268*** (0.208, 0.344)            | -2.177 (-16.259, 14.272)          | -16.891*** (-18.506, -15.245)         |
| 60-69                                                            | 2.900*** (2.663, 3.158)            | -1.845 (-6.638, 3.195)            | 17.335*** (15.520, 19.179)            |
| 70-79                                                            | 5.991*** (5.541, 6.478)            | 2.266 (-2.269, 7.011)             | 36.292*** (34.166, 38.452)            |
| 80+                                                              | 10.595*** (9.808, 11.444)          | 4.773* (0.213, 9.541)             | 52.631*** (50.155, 55.148)            |
| ICU/HDU admission                                                |                                    |                                   |                                       |
| Sex (ref: Female)                                                | 7.487*** (6.738, 8.319)            | 68.114*** (58.934, 77.824)        | 139.889*** (132.846, 147.145)         |
| Male                                                             | 1.307*** (1.266, 1.350)            | 3.231*** (1.713, 4.771)           | 1.051* (0.089, 2.022)                 |
| Number of GI symptoms (max 3)                                    | 0.817*** (0.798, 0.836)            | 4.085*** (2.917, 5.266)           | -0.898** (-1.487, -0.306)             |
| Days from symptom onset to hospital admission (ref: 0-6):        |                                    |                                   |                                       |
| Nosocomial infection                                             | 1.265*** (1.199, 1.335)            | 20.616*** (17.840, 23.457)        | 45.612*** (42.813, 48.466)            |
| 7-13                                                             | 0.735*** (0.707, 0.765)            | -1.904* (-3.717, -0.057)          | -3.486*** (-4.519, -2.443)            |
| 14+                                                              | 0.757*** (0.715, 0.801)            | -0.395 (-3.059, 2.342)            | -6.005*** (-7.515, -4.470)            |
| Pregnant                                                         | 0.615** (0.384, 0.983)             | -5.144 (-27.194, 23.585)          | -18.723*** (-22.483, -14.780)         |
| Comorbidities                                                    |                                    |                                   |                                       |
| Asthma                                                           | 0.927** (0.884, 0.972)             | 2.463* (0.158, 4.821)             | -1.671* (-2.975, -0.349)              |
| Chronic cardiac disease                                          | 1.237*** (1.194, 1.281)            | -2.855*** (-4.367, -1.320)        | 1.325* (0.094, 2.572)                 |
| Chronic haematologic disease                                     | 1.234*** (1.143, 1.333)            | 0.106 (-3.189, 3.514)             | 5.842*** (3.112, 8.645)               |
| Chronic kidney disease                                           | 1.425*** (1.368, 1.485)            | -2.512** (-4.216, -0.777)         | 5.796*** (4.201, 7.416)               |
| Chronic neurological disorder                                    | 1.350*** (1.287, 1.415)            | -0.595 (-2.651, 1.503)            | 15.244*** (13.364, 17.156)            |
| Chronic pulmonary disease                                        | 1.347*** (1.294, 1.402)            | -2.134* (-3.858, -0.379)          | 3.796*** (2.336, 5.276)               |
| Dementia                                                         | 1.460*** (1.395, 1.528)            | -0.804 (-2.740, 1.171)            | 8.837*** (6.840, 10.872)              |
| Diabetes                                                         | 1.132*** (1.085, 1.182)            | -4.198*** (-6.016, -2.345)        | 1.788* (0.372, 3.224)                 |
| HIV/AIDS                                                         | 1.260 (0.967, 1.640)               | 3.974 (-8.188, 17.748)            | 2.282 (-5.017, 10.142)                |
| Hypertension                                                     | 0.956* (0.921, 0.993)              | 0.104 (-1.613, 1.852)             | 1.983*** (0.812, 3.167)               |
| Liver disease                                                    | 1.460*** (1.337, 1.594)            | 4.725* (0.648, 8.966)             | 12.106*** (9.104, 15.190)             |
| Malignant neoplasm                                               | 1.447*** (1.376, 1.522)            | 3.350** (1.120, 5.628)            | 2.199* (0.346, 4.087)                 |
| Malnutrition                                                     | 1.355*** (1.226, 1.498)            | 0.362 (-3.794, 4.698)             | 11.586*** (7.588, 15.733)             |
| Obesity                                                          | 1.149*** (1.092, 1.209)            | -5.508*** (-7.748, -3.213)        | 6.373*** (4.869, 7.898)               |
| Rheumatological disorder                                         | 0.960 (0.914, 1.008)               | 2.142 (-0.127, 4.463)             | 0.636 (-0.987, 2.286)                 |
| Smoking                                                          | 1.138** (1.053, 1.229)             | 4.174* (0.457, 8.029)             | 2.175* (0.009, 4.387)                 |
| Interaction: ICU/HDU admission × month of admission (ref: April) |                                    |                                   |                                       |
| March                                                            | 1.031 (0.930, 1.143)               | -14.181*** (-17.914, -10.278)     | 0.638 (-3.092, 4.511)                 |
| May                                                              | 1.102 (0.945, 1.285)               | -12.140*** (-17.705, -6.198)      | -8.976*** (-13.861, -3.815)           |
| June                                                             | 1.249* (1.023, 1.525)              | -8.951* (-16.578, -0.626)         | -11.282*** (-17.100, -5.055)          |
| July                                                             | 1.385* (1.040, 1.845)              | -14.473* (-25.526, -1.779)        | -18.800*** (-25.201, -11.850)         |
| August                                                           | 1.149 (0.827, 1.598)               | -28.009*** (-38.519, -15.703)     | -15.608*** (-23.153, -7.323)          |
| September                                                        | 1.093 (0.889, 1.344)               | -16.820*** (-24.314, -8.583)      | -6.925* (-13.081, -0.332)             |
| October                                                          | 1.105 (0.961, 1.272)               | -13.815*** (-19.001, -8.296)      | -11.601*** (-15.924, -7.056)          |
| November                                                         | 1.097 (0.954, 1.262)               | -6.583* (-12.137, -0.677)         | -15.936*** (-20.024, -11.639)         |
| December                                                         | 0.796** (0.689, 0.919)             | -11.471*** (-16.856, -5.738)      | -27.920*** (-31.450, -24.208)         |
| Interaction: ICU/HDU admission × age group (ref: 40-59)          |                                    |                                   |                                       |
| 0-19                                                             | 0.843 (0.473, 1.503)               | -42.648** (-59.184, -19.412)      | 2.160 (-5.645, 10.610)                |
| 20-39                                                            | 1.823*** (1.365, 2.435)            | -11.657 (-25.744, 5.102)          | 0.785 (-3.581, 5.348)                 |
| 60-69                                                            | 0.735*** (0.654, 0.827)            | 2.273 (-3.881, 8.821)             | -7.200*** (-10.376, -3.912)           |
| 70-79                                                            | 0.602*** (0.535, 0.677)            | -11.994*** (-16.979, -6.710)      | -21.758*** (-24.860, -18.527)         |
| 80+                                                              | 0.399*** (0.344, 0.463)            | -28.613*** (-33.082, -23.846)     | -40.114*** (-43.635, -36.373)         |
| Observations                                                     | 102,147                            | 31,250                            | 70,897                                |

Note: \*p<0.1; \*\*p<0.05; \*\*\*p<0.01

368

369 **Table 4:** Combined results of logistic regression analysis identifying predictors of death as an

370 outcome, and two linear regression analyses identifying correlates of time to death and

371 time to discharge. For brevity, the country variable, as well as the “unknown” class for each

372 comorbidity (representing patients with missing data for that condition) are omitted here;

373 see table S7 for a version with them included.

374

375 **Status by days since admission**

376 Figure 3 displays Sankey diagrams reflecting the location of patients within hospital (ward or  
377 ICU) or their final status (dead, discharged, or unknown) on the day of COVID-19 admission  
378 (A), three days later (A+3), seven days later (A+7) or, to represent the final status only, one  
379 day after the last day in hospital (O+1). The plot is faceted by age group and month of  
380 COVID-19 admission. For simplicity, only four months (March, May, June and September)  
381 appear in the main figure, but see Supplementary Figure S2 for all months, featuring a total  
382 of 129,044 patients (90.5%).  
383

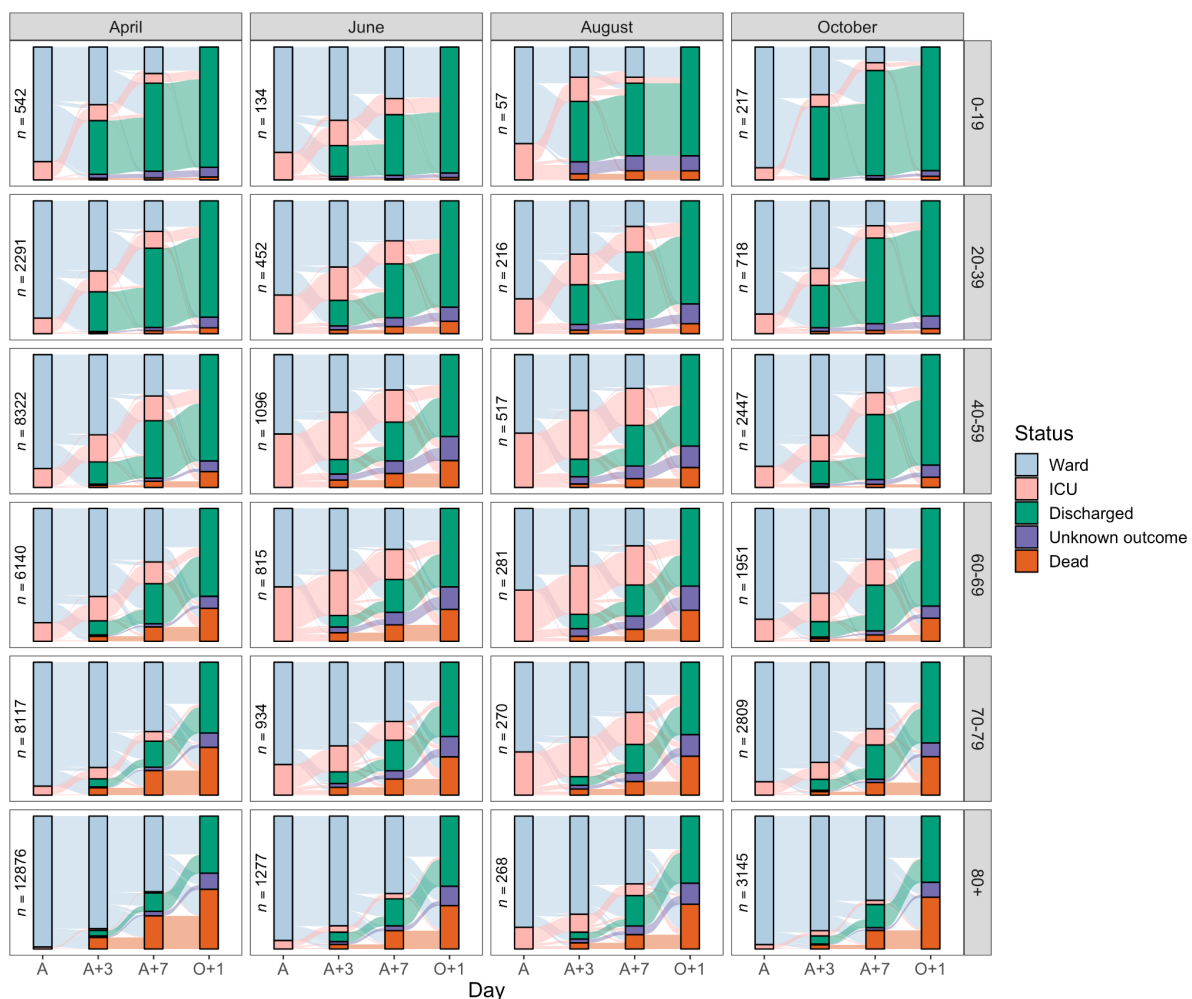

384

385 **Figure 3:** Sankey diagrams depicting the progress through the inpatient journey for patients  
386 with COVID-19 admission in April, June, August and October 2020, and subdivided by age.

387 Bars are presented for the day of admission (A), three and seven days later (A+3 and A+7),  
388 and the day after final outcome (O+1).

389

## 390 **Discussion**

391

392 To the best of our knowledge and at the time of publication, this is the largest international  
393 cohort of COVID-19 patients in the world. Considerable temporal variations in the events  
394 preceding and during hospitalization for patients with confirmed COVID-19 were observed  
395 during the period March to November/December 2020. We specifically looked at length of  
396 illness before admission, probability of ICU/HDU admission, time to ICU/HDU admission for  
397 those so admitted, case fatality rate, and duration of admission overall.

398

399 These results highlight key findings with practical implications for case management,  
400 resource allocation, performance benchmarking, and reporting of outcomes in research,  
401 and point to the fact that patient's journeys vary over time and must be interpreted with  
402 the background of transmission intensity, policy, and practice where cases occur. Therefore,  
403 static 'snapshots' of the situation at any one time may lead to misguided practice and  
404 management if not regularly monitored and approaches adapted accordingly.

405

406 In a recent preprint (Kirwan et al. 2021), Kirwan et al analysed temporal variation on time  
407 from hospital admission to death, discharge or ICU/HDU admission amongst a smaller  
408 cohort of UK patients. We confirm many of the trends that they identified, including the  
409 lower CFRs over the summer and the increased odds of ICU/HDU admission in middle-aged  
410 age groups. They did not, however, detect the increase in the proportion of patients with an

411 ICU/HDU admission during the summer, or the decline in time to discharge amongst non-  
412 ICU/HDU patients over the entire time period. As there were many fewer hospitals included  
413 in that study than in ours (31 versus 620) this may be suggestive of variation in available  
414 ICU/HDU capacity and usage amongst participating sites in the two studies.

415

416 **Prior to admission.** Across all age groups, the length of illness before seeking hospital care  
417 was longest in July and August when case numbers were lower, and shortest at the  
418 extremities of the age distribution and for females. These variations may partially be  
419 explained by variations in health-care-seeking behaviour by different demographics, and by  
420 differences in clinical progression of disease for different groups. For example, patients who  
421 died had consistently shorter duration of illness before hospital admission, possibly  
422 reflecting the fact that more serious cases evolve more rapidly and those affected seek care  
423 earlier – patients admitted after experiencing symptoms for longer than 1 week were less  
424 likely to die. The peak in time to admission during late summer and early autumn in the  
425 Northern Hemisphere may reflect delayed presentation following return from holiday,  
426 particularly given the high proportion of UK patients in this dataset and known viral  
427 importations to the UK from continental Europe around that time (Hodcroft et al. 2020).

428

429 At the same time, when considering the four most frequent symptoms at admission (fever,  
430 short of breath, cough or fatigue), more symptoms were associated with a longer period  
431 between onset of symptoms and admission – and this was consistently so across the entire  
432 period under observation. This could be ascribed at least in part to variations in individual  
433 behaviour; some patients may present to hospital with a single symptom while others may  
434 wait a longer period until several have emerged. In addition, these phenomena could also

435 partially be attributed to how case definitions are applied by physicians, or to the patient's  
436 own perceptions, or to those of their families. Some presentations are likely to be more  
437 alarming to the latter two groups than others; for example, individuals with none of the four  
438 symptoms described above were admitted fastest of all and, amongst these, confusion was  
439 the most prevalent other symptom.

440

441 **During hospitalization.** Treating variables such as final outcome, ICU/HDU admission, or  
442 length of stay, as variables that remain static throughout an evolving epidemic is  
443 problematic, as demonstrated by our analyses. To give three examples: first, the case  
444 fatality rate showed an overall decline from 0.35 for cases admitted in March to 0.21 in July,  
445 followed by a renewed increase to 0.29 in December (see supplementary figure S3). Second,  
446 the data underlying the alluvial plots (figure 3) allow us to determine that the proportion of  
447 patients discharged within a week of admission rose from 0.24 in March to a peak of 0.34 in  
448 September. Third, the proportion of still-admitted patients occupying an ICU/HDU bed  
449 showed considerable variation: for example, at day 3 this went from 0.19 in March to 0.13  
450 in April, then rose to a peak of 0.38 in August before declining again, reaching a low of 0.15  
451 in November. Variations in clinical care, the influence of treatments, and changes in  
452 available bed capacity are all likely to account for many of these differences. In older  
453 patients, the availability of social care space is another important variable.

454

455 Patients older than 80 had odds of being admitted to ICU/HDU over eight times smaller than  
456 those in the 40-59 category, which may reflect prognosis and the expected benefits of  
457 ICU/HDU admission, as well as patient preferences. These decreased odds are also reflective  
458 of the temporality of the data. March and April represent our data's highest volume, which

459 might reflect hospital capacity and the necessity for ICU/HDU prioritization. For the patients  
460 who were admitted to ICU, there was no clear trend in the time from hospital admission to  
461 transfer to ICU/HDU after March. Length of illness before admission to the hospital and  
462 young age were associated with a shorter time from hospital admission to ICU/HDU (for  
463 example, a 9.2% decrease for those waiting 7-13 days from onset compared to those waiting  
464 less than a week, and 32% decrease amongst under-20s compared to the 40-59 age group),  
465 while a smaller proportion of older patients are escalated to ICU/HDU (OR 0.51 for ICU/HDU  
466 admission in the 70-79 age group) and after a longer time spent in the ward (a 4.2% increase  
467 in the same age group).

468

469 **Outcome.** As mentioned above, in patients with an outcome of death or discharge, CFRs  
470 decreased from 0.35 in March to 0.21 by mid-2020 to increase again to 0.29 in December,  
471 mostly following the waves in the pandemic and therefore the number of admissions.  
472 System capacity may be an important predictor of patient outcome and may supersede  
473 other factors such as increasing case management skills and the influence of new therapies.  
474 This also warns against using outcome data that are not adequately controlled to assess  
475 efficacy and safety of treatments or other interventions, as effects may rather reflect  
476 capacity of a system to provide high-quality care.

477

478 We found that shorter time to death is associated with female sex, lack of ICU/HDU  
479 admission, and, amongst ICU/HDU patients, the extremes of age. Shorter time to discharge  
480 is also associated with female sex and lack of ICU/HDU admission, and this variable  
481 increases monotonically with age.

482



483 Cautionary notes in interpreting these findings. First, the dataset analysed is made of  
484 patients on the more severe end of the spectrum of disease compared to cases occurring in  
485 the community. Second, about half of these patients were hospitalized in just two months  
486 (March-April), were predominantly from the UK, and about half were over 70 years old.  
487 These demographics explain the CFR and the large proportion of patients presenting with  
488 age-related comorbidities – nearly half have hypertension, one-in-five chronic cardiac  
489 disease, and one-in-six diabetes. Third, there are inherent limitations of observational data,  
490 however large the dataset. Fourth, some variables are based on patient self-report which  
491 can be inexact; for example it can be clearly seen in figure 1a that multiples of seven  
492 reported days from symptom onset to admission are overrepresented, suggesting reports in  
493 units of weeks. Fifth, one should refrain from overinterpreting data: some of the changes  
494 observed reflect adjustments in practice and logistics, combined pressure on health  
495 systems, more than actual effects of interventions. Sixth, resuscitation status and suitability  
496 for intensive care admission was not collected in our cohort.

497

498 **Implications of findings.** Often, in high-income countries, patient outcomes are seen  
499 through the lens of individualized treatment provided at the clinician patient interface. This  
500 paper demonstrates that outbreak epidemiology has an important influence on patient  
501 outcomes – the patient journey from likelihood of admission, through to disposition and  
502 length of stay in hospital, and overall outcome, change over the course of a pandemic.  
503 There are various explanations for variability – systems may at times be overwhelmed and  
504 unable to provide the usual quality of care to their patients; patient behaviour may change  
505 depending on perceptions of the status of the outbreak and the performance of the  
506 healthcare system at a given time; clinician familiarity with management of patients may

507 vary; and changes in transmissibility and virulence are expected to occur.

508

509 The observed variability should inform on the limitations of using observational data during  
510 a long-lasting pandemic for management purposes in practice, and also question the use of  
511 some variables, such as length of stay in hospital or in ICU, as clinical trial outcomes. This  
512 demonstrates the importance of controlling for patient outcome data when designing  
513 clinical trials; for example, using our data, assessing a new treatment during the months of  
514 March to July will have shown a decrease in CFR from 33%, to 21% that may have been  
515 falsely attributed to a treatment effect without a concurrent randomised control.

516

517 At the same time, these findings also highlight the need for preparedness and resilience; the  
518 crucial importance of pre-positioned observational data collection systems that are adhered  
519 upon by a representative number of sites and are maintained for as long as the pandemic  
520 lasts; and the need for such capacity to be kept in-between epidemics.

521

## 522 **Acknowledgments**

523

524 This work was supported by the UK Foreign, Commonwealth and Development Office and  
525 Wellcome [215091/Z/18/Z] and the Bill & Melinda Gates Foundation [OPP1209135]; CIHR  
526 Coronavirus Rapid Research Funding Opportunity OV2170359; Grants from Rapid European  
527 COVID-19 Emergency Response research (RECOVER) [H2020 project 101003589] and  
528 European Clinical Research Alliance on Infectious Diseases (ECRAID) [965313]; The Imperial  
529 NIHR Biomedical Research Centre; The Cambridge NIHR Biomedical Research Centre; and  
530 Endorsed by the Irish Critical Care- Clinical Trials Group, co-ordinated in Ireland by the Irish

531 Critical Care- Clinical Trials Network at University College Dublin and funded by the Health  
532 Research Board of Ireland [CTN-2014-12].  
533  
534 This work uses Data / Material provided by patients and collected by the NHS as part of their  
535 care and support #DataSavesLives. The Data / Material used for this research were obtained  
536 from ISARIC4C. The COVID-19 Clinical Information Network (CO-CIN) data was collated by  
537 ISARIC4C Investigators. Data and Material provision was supported by grants from: the  
538 National Institute for Health Research (NIHR; award CO-CIN-01), the Medical Research  
539 Council (MRC; grant MC\_PC\_19059), and by the NIHR Health Protection Research Unit  
540 (HPRU) in Emerging and Zoonotic Infections at University of Liverpool in partnership with  
541 Public Health England (PHE), (award 200907), Wellcome Trust [Turtle, Lance-fellowship  
542 205228/Z/16/Z], NIHR HPRU in Respiratory Infections at Imperial College London with PHE  
543 (award 200927), Liverpool Experimental Cancer Medicine Centre (grant C18616/A25153),  
544 NIHR Biomedical Research Centre at Imperial College London (award IS-BRC-1215-20013),  
545 and NIHR Clinical Research Network providing infrastructure support.  
546  
547 This work was possible due to the dedication and hard work of the Norwegian SARS-CoV-2  
548 study team, and supported by grants from Research Council of Norway grant no 312780,  
549 and a philanthropic donation from Vivaldi Invest A/S owned by Jon Stephenson von  
550 Tetzchner; The dedication and hard work of the Groote Schuur Hospital Covid ICU Team,  
551 and supported by the Groote Schuur nursing and University of Cape Town registrar bodies  
552 coordinated by the Division of Critical Care at the University of Cape Town; and supported  
553 by the COVID clinical management team, AIIMS, Rishikesh, India.  
554

555 Matthew Hall and Christophe Fraser were supported by a Li Ka Shing Foundation award to

556 Christophe Fraser.

557

558

559

## 560 References

- 561 Bell, Lucy C. K., Caitlin Norris-Grey, Akish Luintel, Gabriella Bidwell, David Lanham, Michael Marks,  
562 Tim Baruah, et al. 2021. "Implementation and Evaluation of a COVID-19 Rapid Follow-up Service  
563 for Patients Discharged from the Emergency Department." *Clinical Medicine* 21 (1): e57–62.
- 564 Brunson, Jason. 2020. "Ggalluvial: Layered Grammar for Alluvial Plots." *Journal of Open Source*  
565 *Software* 5 (49): 2017.
- 566 CMO Messaging. 2021. "Wuhan Novel Coronavirus." Mhra.gov.uk. 2021.  
567 <https://www.cas.mhra.gov.uk/ViewandAcknowledgment/ViewAlert.aspx?AlertID=102959>.
- 568 Dennis, John M., Andrew P. McGovern, Sebastian J. Vollmer, and Bilal A. Mateen. 2021. "Improving  
569 Survival of Critical Care Patients With Coronavirus Disease 2019 in England: A National Cohort  
570 Study, March to June 2020." *Critical Care Medicine* 49 (2): 209–14.
- 571 Docherty, Annemarie B., Rachel H. Mulholland, Nazir I. Lone, Christopher P. Cheyne, Daniela De  
572 Angelis, Karla Diaz-Ordaz, Cara Donegan, et al. 2021. "Changes in in-Hospital Mortality in the  
573 First Wave of COVID-19: A Multicentre Prospective Observational Cohort Study Using the WHO  
574 Clinical Characterisation Protocol UK." *The Lancet. Respiratory Medicine*, May.  
575 [https://doi.org/10.1016/S2213-2600\(21\)00175-2](https://doi.org/10.1016/S2213-2600(21)00175-2).
- 576 Hodcroft, Emma B., Moira Zuber, Sarah Nadeau, Inaki Comas, Fernando Gonzalez Candelas,  
577 SeqCOVID-SPAIN consortium, Tanja Stadler, and Richard A. Neher. 2020. "Emergence and  
578 Spread of a SARS-CoV-2 Variant through Europe in the Summer of 2020." *medRxiv*, October,  
579 2020.10.25.20219063.
- 580 ISARIC Clinical Characterisation Group. 2020. "Global Outbreak Research: Harmony Not Hegemony."  
581 *The Lancet Infectious Diseases*, June. [https://doi.org/10.1016/S1473-3099\(20\)30440-0](https://doi.org/10.1016/S1473-3099(20)30440-0).
- 582 ISARIC Clinical Characterisation Group, Mark G. Pritchard, and Piero L. Olliaro. 2020. "Symptoms at  
583 Presentation for Patients Admitted to Hospital with Covid-19: Results from the ISARIC  
584 Prospective Multinational Observational Study." *medRxiv : The Preprint Server for Health*  
585 *Sciences*, October. <https://doi.org/10.1101/2020.10.26.20219519>.
- 586 Kirwan, Peter D., Suzanne Elgohari, Christopher H. Jackson, Brian D. M. Tom, Sema Mandal, Daniela  
587 De Angelis, and Anne M. Presanis. 2021. "Trends in Risks of Severe Events and Lengths of Stay  
588 for COVID-19 Hospitalisations in England over the Pre-Vaccination Era: Results from the Public  
589 Health England SARI-Watch Surveillance Scheme." *arXiv [stat.AP]*. arXiv.  
590 <http://arxiv.org/abs/2103.04867>.
- 591 National Institute for Health and Care Excellence. 2021. "COVID-19 Rapid Guideline: Managing  
592 COVID-19." <https://www.nice.org.uk/>. NICE. 2021. <https://www.nice.org.uk/guidance/ng191/>.
- 593 Nunan, J., D. Clarke, A. Malakouti, D. Tannetta, A. Calthrop, X. H. Xu, N. B. Chan, R. Khalil, W. Li, and  
594 A. Walden. 2020. "Triage Into the Community for COVID-19 (TICC-19) Patients Pathway - Service  
595 Evaluation of the Virtual Monitoring of Patients with COVID Pneumonia." *Acute Medicine* 19 (4):  
596 183–91.
- 597 Pagel, C., M. Utey, and S. Ray. 2020. "Covid-19: How to Triage Effectively in a Pandemic." *BMJ*  
598 *Opinion*. March 9, 2020. [https://blogs.bmj.com/bmj/2020/03/09/covid-19-triage-in-a-](https://blogs.bmj.com/bmj/2020/03/09/covid-19-triage-in-a-pandemic-is-even-thornier-than-you-might-think/)  
599 [pandemic-is-even-thornier-than-you-might-think/](https://blogs.bmj.com/bmj/2020/03/09/covid-19-triage-in-a-pandemic-is-even-thornier-than-you-might-think/).

600 R Core Team. 2013. "R: A Language and Environment for Statistical Computing." [https://www.R-](https://www.R-project.org/)  
601 [project.org/](https://www.R-project.org/).

602 Rochweg, Bram, Reed Ac Siemieniuk, Thomas Agoritsas, François Lamontagne, Lisa Askie, Lyubov  
603 Lytvyn, Arnav Agarwal, et al. 2020. "A Living WHO Guideline on Drugs for Covid-19." *BMJ* 370  
604 (September): m3379.

605 Rojek, Amanda M., and Peter W. Horby. 2016. "Modernising Epidemic Science: Enabling Patient-  
606 Centred Research during Epidemics." *BMC Medicine* 14 (1): 212.

607 Tyrrell, Carina S. B., Oliver T. Mytton, Sarah V. Gentry, Molly Thomas-Meyer, John Lee Y. Allen,  
608 Antony A. Narula, Brendan McGrath, et al. 2021. "Managing Intensive Care Admissions When  
609 There Are Not Enough Beds during the COVID-19 Pandemic: A Systematic Review." *Thorax* 76  
610 (3): 302–12.

611 Wickham, Hadley, Mara Averick, Jennifer Bryan, Winston Chang, Lucy McGowan, Romain François,  
612 Garrett Grolemond, et al. 2019. "Welcome to the Tidyverse." *Journal of Open Source Software* 4  
613 (43): 1686.

614 World Health Organisation. 2021. "COVID-19 Clinical Management: Living Guidance." World Health  
615 Organization. January 25, 2021. [https://www.who.int/publications/i/item/WHO-2019-nCoV-](https://www.who.int/publications/i/item/WHO-2019-nCoV-clinical-2021-1)  
616 [clinical-2021-1](https://www.who.int/publications/i/item/WHO-2019-nCoV-clinical-2021-1).

617
