# Supplementary material for: Ten months of temporal variation in the clinical journey of hospitalised patients with COVID-19: an observational cohort
Source: bioRxiv or medRxiv preprint supplement (doi:10.1101/2021.06.01.21258150), 2021-06-03
Supplement: Supplementary file [file media-2.pdf]

TABLE S1

| Variable             | Value   | Total         | March        | April        | May          | June        | July        | August      | September   | October      | November     | December     | 2021        |
|----------------------|---------|---------------|--------------|--------------|--------------|-------------|-------------|-------------|-------------|--------------|--------------|--------------|-------------|
| Sex                  | Female  | 60977 (42.8)  | 10709 (39.5) | 18102 (42.8) | 5732 (46.6)  | 2366 (44.3) | 1200 (42.7) | 865 (39)    | 2233 (42.4) | 5912 (42.8)  | 6642 (43.8)  | 5958 (45.1)  | 1258 (41.4) |
|                      | Male    | 81325 (57.1)  | 16347 (60.3) | 24092 (57)   | 6565 (53.3)  | 2972 (55.6) | 1608 (57.2) | 1350 (60.9) | 3015 (57.3) | 7887 (57.1)  | 8485 (56)    | 7229 (54.7)  | 1775 (58.5) |
|                      | Unknown | 238 (0.167)   | 52 (0.192)   | 73 (0.173)   | 14 (0.114)   | 4 (0.0749)  | 3 (0.107)   | 3 (0.135)   | 17 (0.323)  | 23 (0.166)   | 28 (0.185)   | 18 (0.136)   | 3 (0.0988)  |
| Age group            | 0-19    | 2730 (1.92)   | 581 (2.14)   | 563 (1.33)   | 319 (2.59)   | 129 (2.41)  | 68 (2.42)   | 59 (2.66)   | 113 (2.15)  | 258 (1.87)   | 310 (2.05)   | 297 (2.25)   | 33 (1.09)   |
|                      | 20-39   | 9546 (6.7)    | 1701 (6.27)  | 2423 (5.73)  | 759 (6.17)   | 478 (8.95)  | 334 (11.9)  | 261 (11.8)  | 550 (10.4)  | 890 (6.44)   | 964 (6.36)   | 942 (7.13)   | 244 (8.04)  |
|                      | 40-59   | 31368 (22)    | 5756 (21.2)  | 9223 (21.8)  | 2308 (18.7)  | 1167 (21.8) | 720 (25.6)  | 658 (29.7)  | 1280 (24.3) | 2904 (21)    | 3273 (21.6)  | 3110 (23.6)  | 969 (31.9)  |
|                      | 60-69   | 23431 (16.4)  | 4581 (16.9)  | 6885 (16.3)  | 1769 (14.4)  | 872 (16.3)  | 459 (16.3)  | 361 (16.3)  | 897 (17)    | 2303 (16.7)  | 2590 (17.1)  | 2098 (15.9)  | 616 (20.3)  |
|                      | 70-79   | 30541 (21.4)  | 5854 (21.6)  | 8988 (21.3)  | 2516 (20.4)  | 1034 (19.4) | 473 (16.8)  | 344 (15.5)  | 1095 (20.8) | 3356 (24.3)  | 3497 (23.1)  | 2744 (20.8)  | 640 (21.1)  |
|                      | 80+     | 42092 (29.5)  | 7099 (26.2)  | 13967 (33)   | 4555 (37)    | 1470 (27.5) | 548 (19.5)  | 341 (15.4)  | 1186 (22.5) | 4017 (29.1)  | 4439 (29.3)  | 3949 (29.9)  | 521 (17.2)  |
|                      | Unknown | 2832 (1.99)   | 1536 (5.67)  | 218 (0.516)  | 85 (0.69)    | 192 (3.59)  | 209 (7.44)  | 194 (8.75)  | 144 (2.74)  | 94 (0.68)    | 82 (0.541)   | 65 (0.492)   | 13 (0.428)  |
| Nosocomial infection | No      | 121910 (85.5) | 23620 (87.1) | 36942 (87.4) | 10158 (82.5) | 4509 (84.4) | 2417 (86)   | 1959 (88.3) | 4486 (85.2) | 11417 (82.6) | 12587 (83.1) | 10779 (81.6) | 3036 (100)  |
|                      | Yes     | 11695 (8.2)   | 2575 (9.5)   | 4045 (9.57)  | 1209 (9.82)  | 346 (6.48)  | 138 (4.91)  | 62 (2.8)    | 213 (4.05)  | 910 (6.58)   | 1092 (7.21)  | 1105 (8.37)  | 0 (0)       |
|                      | Unknown | 8935 (6.27)   | 913 (3.37)   | 1280 (3.03)  | 944 (7.67)   | 487 (9.12)  | 256 (9.11)  | 197 (8.88)  | 566 (10.8)  | 1495 (10.8)  | 1476 (9.74)  | 1321 (10)    | 0 (0)       |
| Pregnancy            | Yes     | 1030 (0.723)  | 176 (0.649)  | 200 (0.473)  | 67 (0.544)   | 41 (0.768)  | 42 (1.49)   | 37 (1.67)   | 68 (1.29)   | 124 (0.897)  | 119 (0.785)  | 130 (0.984)  | 26 (0.856)  |
|                      | No      | 139630 (98)   | 26545 (97.9) | 41524 (98.2) | 12111 (98.4) | 5252 (98.3) | 2754 (98)   | 2145 (96.7) | 5095 (96.8) | 13518 (97.8) | 14829 (97.8) | 12901 (97.7) | 2956 (97.4) |
|                      | Unknown | 1880 (1.32)   | 387 (1.43)   | 543 (1.28)   | 133 (1.08)   | 49 (0.917)  | 15 (0.534)  | 36 (1.62)   | 102 (1.94)  | 180 (1.3)    | 207 (1.37)   | 174 (1.32)   | 54 (1.78)   |



TABLE S1

| Variable            | Value   | Total         | March        | April        | May          | June        | July        | August      | September   | October      | November     | December     | 2021        |
|---------------------|---------|---------------|--------------|--------------|--------------|-------------|-------------|-------------|-------------|--------------|--------------|--------------|-------------|
| Seizures            | Yes     | 1821 (1.28)   | 328 (1.21)   | 544 (1.29)   | 228 (1.85)   | 96 (1.8)    | 30 (1.07)   | 25 (1.13)   | 60 (1.14)   | 164 (1.19)   | 180 (1.19)   | 146 (1.11)   | 20 (0.659)  |
|                     | No      | 121559 (85.3) | 22794 (84.1) | 35061 (83)   | 10408 (84.5) | 4709 (88.2) | 2606 (92.7) | 2031 (91.6) | 4735 (89.9) | 12203 (88.3) | 13136 (86.7) | 11271 (85.4) | 2605 (85.8) |
|                     | Unknown | 19160 (13.4)  | 3986 (14.7)  | 6662 (15.8)  | 1675 (13.6)  | 537 (10.1)  | 175 (6.23)  | 162 (7.3)   | 470 (8.93)  | 1455 (10.5)  | 1839 (12.1)  | 1788 (13.5)  | 411 (13.5)  |
| Shortness of breath | Yes     | 92129 (64.6)  | 17563 (64.8) | 28137 (66.6) | 7116 (57.8)  | 3223 (60.3) | 1665 (59.2) | 1347 (60.7) | 3293 (62.5) | 8896 (64.4)  | 9791 (64.6)  | 8580 (65)    | 2518 (82.9) |
|                     | No      | 50146 (35.2)  | 9469 (34.9)  | 14087 (33.3) | 5178 (42.1)  | 2116 (39.6) | 1142 (40.6) | 865 (39)    | 1967 (37.4) | 4901 (35.5)  | 5319 (35.1)  | 4589 (34.8)  | 513 (16.9)  |
|                     | Unknown | 265 (0.186)   | 76 (0.28)    | 43 (0.102)   | 17 (0.138)   | 3 (0.0562)  | 4 (0.142)   | 6 (0.271)   | 5 (0.095)   | 25 (0.181)   | 45 (0.297)   | 36 (0.273)   | 5 (0.165)   |
| Ulcers              | Yes     | 2306 (1.62)   | 396 (1.46)   | 849 (2.01)   | 317 (2.57)   | 98 (1.83)   | 25 (0.889)  | 23 (1.04)   | 44 (0.836)  | 163 (1.18)   | 186 (1.23)   | 190 (1.44)   | 15 (0.494)  |
|                     | No      | 105553 (74.1) | 18599 (68.6) | 31023 (73.4) | 8833 (71.7)  | 3733 (69.9) | 1759 (62.6) | 1254 (56.5) | 4140 (78.6) | 11179 (80.9) | 12154 (80.2) | 10429 (79)   | 2450 (80.7) |
|                     | Unknown | 34681 (24.3)  | 8113 (29.9)  | 10395 (24.6) | 3161 (25.7)  | 1511 (28.3) | 1027 (36.5) | 941 (42.4)  | 1081 (20.5) | 2480 (17.9)  | 2815 (18.6)  | 2586 (19.6)  | 571 (18.8)  |
| Vomiting            | Yes     | 25135 (17.6)  | 4611 (17)    | 7291 (17.2)  | 2236 (18.2)  | 893 (16.7)  | 451 (16)    | 376 (17)    | 1130 (21.5) | 2589 (18.7)  | 2750 (18.1)  | 2250 (17)    | 558 (18.4)  |
|                     | No      | 101164 (71)   | 19063 (70.3) | 29401 (69.6) | 8676 (70.5)  | 3985 (74.6) | 2212 (78.7) | 1705 (76.9) | 3764 (71.5) | 9988 (72.3)  | 10829 (71.5) | 9425 (71.4)  | 2116 (69.7) |
|                     | Unknown | 16241 (11.4)  | 3434 (12.7)  | 5575 (13.2)  | 1399 (11.4)  | 464 (8.69)  | 148 (5.27)  | 137 (6.18)  | 371 (7.05)  | 1245 (9.01)  | 1576 (10.4)  | 1530 (11.6)  | 362 (11.9)  |
| Wheezing            | Yes     | 9011 (6.32)   | 2149 (7.93)  | 2745 (6.49)  | 718 (5.83)   | 238 (4.46)  | 120 (4.27)  | 88 (3.97)   | 313 (5.94)  | 877 (6.34)   | 929 (6.13)   | 669 (5.07)   | 165 (5.43)  |
|                     | No      | 109017 (76.5) | 19610 (72.3) | 31184 (73.8) | 9522 (77.3)  | 4443 (83.2) | 2443 (86.9) | 1931 (87.1) | 4342 (82.5) | 11064 (80)   | 11903 (78.5) | 10223 (77.4) | 2352 (77.5) |
|                     | Unknown | 24512 (17.2)  | 5349 (19.7)  | 8338 (19.7)  | 2071 (16.8)  | 661 (12.4)  | 248 (8.82)  | 199 (8.97)  | 610 (11.6)  | 1881 (13.6)  | 2323 (15.3)  | 2313 (17.5)  | 519 (17.1)  |
